# Supplementary material for: Intrinsic laws of k-mer spectra of genome sequences and evolution mechanism of genomes
Source: Research Square preprint supplement (doi:10.21203/rs.3.rs-33500/v2), 2020-10-24
Supplement: Supplementary file 1 [file 163bb9756018713c00fe8b02.docx]

**Supplemental Table S3** Linear correlation coefficients between the G+C content and the intensities of CG and TA independent selections in each species group

|  |  |  | Animal |  |  | Plant | Fungus | Archaca | Eubacteria |
| --- | --- | --- | --- | --- | --- | --- | --- | --- | --- |
|  | Pri | Rod | Mam | Vrt | Inv |  |  |  |  |
|  | (13) | (14) | (22) | (20) | (43) | (63) | (245) | (200) | (300) |
| δCG2-G+C% | 0.210 | -0.144 | -0.675** | -0.482* | -0.524** | -0.860** | -0.812** |  |  |
| δCG1-G+C% | 0.221 | -0.516 | -0.697** | -0.472* | -0.601** | -0.895** | -0.875** | -0.897** | -0.886** |
| ρCG2-G+C% | 0.248 | -0.167 | -0.576** | -0.656** | -0.737** | -0.740** | -0.808** |  |  |
| ρCG1-G+C% | 0.385 | -0.342 | -0.702** | -0.550* | -0.674** | -0.844** | -0.794** | -0.758** | -0.721** |
| δTA2-G+C% | 0.669* | 0.749** | 0.767** | 0.739** | 0.706** | 0.916** | 0.785** |  |  |
| δTA1-G+C% | -0.227 | 0.743** | 0.853** | 0.760** | 0.816** | 0.948** | 0.925** | 0.956** | 0.903** |
| ρTA2-G+C% | 0.568* | 0.400 | -0.384 | 0.148 | 0.273 | 0.833** | 0.348** |  |  |
| ρTA1-G+C% | 0.514 | 0.638* | 0.368 | 0.472* | 0.426** | 0.891** | 0.715** | 0.929** | 0.768** |

Note:Two-tailde significance:*,P<0.05;**,P<0.01.
