# Supplementary material for: Intrinsic laws of k-mer spectra of genome sequences and evolution mechanism of genomes
Source: Research Square preprint supplement (doi:10.21203/rs.3.rs-33500/v2), 2020-10-24
Supplement: Supplementary file 2 [file afa99a2a37d8da1c28b8b998.xlsx]

## Sheet: Sheet1
Supplemental Table S2 The point estimation of the separability and the conservatism for all XY 8-mer subsets in each species group
Group	Genome No.	Point estimation	CG	GC	AA	AC	AG	AT	CA	CC	CT	GA	GG	GT	TA	TC	TG	TT
		XY0 separability	0.743±0.004	0.904±0.001	1.074±0.002	0.944±0.003	1.051±0.004	1.068±0.007	1.071±0.002	0.959±0.002	1.051±0.003	0.973±0.002	0.958±0.001	0.944±0.002	1.010±0.003	0.973±0.002	1.071±0.002	1.074±0.002
		XY1 separability	2.117±0.048	1.160±0.004	0.972±0.002	1.101±0.005	0.955±0.005	0.940±0.007	0.924±0.002	1.118±0.006	0.954±0.005	1.063±0.004	1.118±0.005	1.101±0.004	1.013±0.007	1.063±0.004	0.924±0.003	0.972±0.002
Primates	13	XY2 separability	4.052±0.282	1.578±0.021	0.692±0.004	1.132±0.014	0.782±0.005	0.741±0.012	0.786±0.004	1.057±0.013	0.782±0.005	0.947±0.009	1.057±0.013	1.131±0.011	0.834±0.007	0.947±0.010	0.786±0.005	0.691±0.006
		XY0 conservatism	1.348±0.043	0.985±0.003	1.043±0.003	0.955±0.001	0.949±0.003	1.009±0.007	0.958±0.004	0.958±0.002	0.949±0.002	0.989±0.003	0.958±0.002	0.955±0.001	0.970±0.004	0.989±0.004	0.958±0.004	1.044±0.003
		XY1 conservatism	3.216±0.593	1.107±0.015	1.134±0.010	1.108±0.003	1.131±0.005	1.032±0.006	1.101±0.011	1.137±0.008	1.131±0.005	1.043±0.006	1.137±0.006	1.108±0.004	1.071±0.005	1.042±0.006	1.101±0.010	1.134±0.010
		XY2 conservatism	4.121±0.942	1.309±0.046	0.839±0.007	1.180±0.015	1.192±0.017	1.019±0.017	1.375±0.027	1.147±0.029	1.192±0.017	0.937±0.011	1.149±0.028	1.179±0.013	1.041±0.032	0.935±0.012	1.378±0.021	0.838±0.006
		XY0 separability	0.735±0.016	0.898±0.015	1.072±0.017	0.946±0.007	1.059±0.008	1.063±0.024	1.073±0.011	0.958±0.008	1.059±0.008	0.976±0.007	0.958±0.008	0.946±0.008	1.013±0.014	0.976±0.007	1.073±0.012	1.072±0.017
		XY1 separability	2.249±0.260	1.179±0.034	0.970±0.016	1.102±0.009	0.947±0.006	0.945±0.024	0.925±0.009	1.116±0.022	0.947±0.006	1.058±0.010	1.117±0.022	1.102±0.011	1.005±0.018	1.058±0.010	0.926±0.009	0.971±0.015
Rodent	14	XY2 separability	4.459±1.308	1.612±0.200	0.701±0.039	1.093±0.058	0.761±0.029	0.753±0.050	0.769±0.039	1.066±0.039	0.761±0.029	0.941±0.031	1.067±0.038	1.094±0.061	0.842±0.048	0.941±0.032	0.769±0.040	0.701±0.038
		XY0 conservatism	1.441±0.204	0.983±0.023	1.035±0.041	0.961±0.010	0.952±0.024	0.998±0.048	0.955±0.011	0.958±0.013	0.952±0.025	0.996±0.009	0.958±0.013	0.961±0.010	0.963±0.038	0.996±0.008	0.955±0.011	1.035±0.041
		XY1 conservatism	4.686±1.985	1.135±0.059	1.126±0.041	1.108±0.018	1.144±0.058	1.048±0.060	1.126±0.026	1.130±0.047	1.143±0.060	1.036±0.014	1.131±0.047	1.109±0.018	1.085±0.077	1.035±0.013	1.126±0.026	1.126±0.040
		XY2 conservatism	6.064±3.283	1.308±0.153	0.869±0.080	1.066±0.150	1.156±0.146	1.044±0.106	1.296±0.211	1.170±0.095	1.155±0.148	0.896±0.056	1.174±0.090	1.066±0.152	1.072±0.113	0.895±0.057	1.296±0.210	0.869±0.079
		XY0 separability	0.751±0.038	0.900±0.033	1.073±0.030	0.945±0.014	1.047±0.011	1.061±0.045	1.064±0.014	0.962±0.020	1.047±0.011	0.978±0.010	0.961±0.020	0.945±0.014	1.006±0.038	0.979±0.011	1.064±0.014	1.073±0.030
		XY1 separability	2.064±0.545	1.179±0.085	0.971±0.034	1.100±0.027	0.962±0.012	0.948±0.045	0.932±0.013	1.115±0.040	0.962±0.012	1.055±0.017	1.115±0.040	1.100±0.026	1.018±0.052	1.055±0.017	0.932±0.013	0.971±0.034
Other mammals	22	XY2 separability	3.735±1.915	1.588±0.413	0.699±0.057	1.120±0.074	0.779±0.034	0.751±0.082	0.798±0.040	1.041±0.106	0.779±0.034	0.931±0.047	1.041±0.106	1.121±0.071	0.854±0.097	0.931±0.048	0.799±0.039	0.699±0.058
		XY0 conservatism	1.354±0.161	0.975±0.024	1.050±0.031	0.952±0.018	0.947±0.022	1.015±0.042	0.950±0.023	0.954±0.013	0.947±0.022	0.996±0.011	0.954±0.013	0.952±0.018	0.972±0.029	0.996±0.011	0.950±0.023	1.050±0.031
		XY1 conservatism	3.823±2.609	1.166±0.091	1.119±0.047	1.122±0.056	1.152±0.046	1.026±0.048	1.123±0.048	1.151±0.054	1.152±0.046	1.041±0.037	1.151±0.054	1.123±0.055	1.069±0.052	1.041±0.037	1.124±0.048	1.119±0.047
		XY2 conservatism	4.846±4.557	1.368±0.308	0.841±0.073	1.177±0.100	1.135±0.185	0.991±0.117	1.392±0.173	1.170±0.118	1.135±0.186	0.883±0.077	1.171±0.117	1.178±0.097	1.038±0.158	0.883±0.077	1.393±0.174	0.842±0.073
		XY0 separability	0.789±0.105	0.930±0.037	1.064±0.043	0.960±0.028	1.030±0.053	1.047±0.057	1.074±0.028	0.954±0.030	1.030±0.053	0.972±0.021	0.954±0.031	0.960±0.028	0.987±0.062	0.972±0.021	1.074±0.028	1.064±0.043
		XY1 separability	1.795±0.758	1.115±0.063	0.983±0.055	1.078±0.043	0.980±0.067	0.960±0.064	0.928±0.034	1.118±0.069	0.980±0.068	1.060±0.032	1.118±0.069	1.078±0.043	1.044±0.094	1.060±0.032	0.928±0.034	0.983±0.055
Other vertebrates	20	XY2 separability	2.838±2.024	1.333±0.305	0.712±0.090	1.051±0.134	0.840±0.128	0.802±0.122	0.759±0.039	1.107±0.170	0.840±0.129	0.977±0.099	1.107±0.171	1.051±0.132	0.936±0.205	0.978±0.098	0.759±0.039	0.712±0.090
		XY0 conservatism	1.250±0.394	0.971±0.079	1.040±0.065	0.964±0.017	0.945±0.043	1.007±0.093	0.973±0.019	0.947±0.036	0.945±0.046	0.973±0.051	0.947±0.035	0.964±0.015	0.978±0.092	0.972±0.054	0.973±0.018	1.040±0.066
		XY1 conservatism	3.272±2.076	1.151±0.251	1.160±0.141	1.121±0.145	1.153±0.176	1.041±0.113	1.139±0.169	1.222±0.265	1.154±0.183	1.088±0.169	1.221±0.260	1.122±0.147	1.089±0.138	1.089±0.176	1.139±0.171	1.160±0.145
		XY2 conservatism	4.024±3.041	1.211±0.410	0.872±0.123	1.029±0.307	1.173±0.307	1.011±0.269	1.182±0.377	1.274±0.370	1.178±0.291	0.994±0.189	1.270±0.368	1.029±0.301	1.039±0.340	0.998±0.174	1.183±0.370	0.872±0.128
		XY0 separability	0.894±0.095	0.915±0.098	1.114±0.079	0.962±0.024	0.963±0.030	1.120±0.118	1.011±0.042	0.919±0.053	0.963±0.030	0.988±0.043	0.919±0.053	0.962±0.024	1.039±0.137	0.988±0.043	1.011±0.042	1.114±0.079
		XY1 separability	1.235±0.277	1.178±0.219	0.932±0.076	1.068±0.044	1.070±0.060	0.899±0.086	0.993±0.053	1.183±0.149	1.070±0.060	1.028±0.060	1.183±0.149	1.068±0.044	0.991±0.148	1.028±0.060	0.993±0.053	0.932±0.076
		XY2 separability	1.532±0.910	1.387±0.698	0.640±0.116	1.063±0.106	1.055±0.133	0.676±0.199	0.932±0.169	1.420±0.418	1.055±0.134	0.984±0.160	1.419±0.416	1.064±0.105	0.808±0.336	0.984±0.160	0.932±0.169	0.640±0.116
Invertebrate	43	XY0 conservatism	0.909±0.063	0.899±0.039	1.197±0.145	0.919±0.042	0.907±0.036	1.204±0.239	0.939±0.044	0.920±0.025	0.907±0.036	0.926±0.056	0.920±0.025	0.918±0.042	1.118±0.233	0.926±0.056	0.938±0.044	1.196±0.146
		XY1 conservatism	1.709±0.616	1.582±0.514	1.138±0.137	1.228±0.119	1.267±0.138	0.973±0.103	1.139±0.120	1.600±0.490	1.267±0.139	1.181±0.170	1.600±0.491	1.228±0.120	0.990±0.154	1.182±0.170	1.139±0.121	1.138±0.138
		XY2 conservatism	2.619±1.926	2.173±1.747	0.726±0.130	1.391±0.584	1.455±0.579	0.749±0.257	1.308±0.472	2.074±1.049	1.457±0.580	1.350±0.473	2.066±1.059	1.391±0.583	0.791±0.409	1.351±0.474	1.309±0.471	0.727±0.131
		XY0 separability	0.805±0.046	0.861±0.031	1.139±0.037	0.954±0.017	0.987±0.014	1.155±0.057	1.021±0.017	0.919±0.023	0.987±0.014	0.989±0.017	0.919±0.023	0.954±0.017	1.072±0.052	0.989±0.017	1.021±0.016	1.139±0.037
		XY1 separability	1.584±0.261	1.296±0.105	0.892±0.031	1.083±0.031	1.032±0.020	0.871±0.038	0.980±0.021	1.187±0.066	1.033±0.020	1.033±0.026	1.187±0.066	1.083±0.031	0.941±0.050	1.033±0.026	0.981±0.021	0.892±0.031
Dicotyledons	28	XY2 separability	2.417±0.823	1.897±0.386	0.622±0.051	1.092±0.084	0.955±0.066	0.611±0.080	0.888±0.046	1.355±0.166	0.955±0.065	0.934±0.066	1.355±0.167	1.092±0.084	0.721±0.097	0.934±0.066	0.888±0.045	0.622±0.051
		XY0 conservatism	1.021±0.072	0.943±0.033	1.178±0.054	0.919±0.017	0.908±0.017	1.190±0.097	0.939±0.023	0.927±0.016	0.908±0.017	0.937±0.021	0.927±0.016	0.919±0.017	1.080±0.082	0.937±0.021	0.939±0.023	1.177±0.054
		XY1 conservatism	2.683±0.817	1.596±0.247	1.112±0.064	1.206±0.065	1.226±0.065	0.997±0.041	1.125±0.057	1.418±0.159	1.226±0.065	1.144±0.059	1.419±0.158	1.206±0.064	0.994±0.049	1.144±0.059	1.125±0.056	1.112±0.063
		XY2 conservatism	3.986±2.681	2.317±0.721	0.772±0.089	1.394±0.161	1.352±0.191	0.795±0.146	1.258±0.140	1.708±0.321	1.352±0.192	1.133±0.138	1.708±0.321	1.394±0.160	0.782±0.147	1.133±0.142	1.258±0.138	0.773±0.089
		XY0 separability	0.889±0.041	0.952±0.042	1.042±0.035	0.959±0.008	0.994±0.013	1.051±0.056	1.027±0.009	0.974±0.029	0.994±0.013	0.997±0.014	0.974±0.029	0.959±0.009	0.977±0.042	0.997±0.014	1.027±0.009	1.042±0.035
		XY1 separability	1.258±0.137	1.089±0.076	0.984±0.042	1.073±0.014	1.022±0.021	0.961±0.053	0.973±0.011	1.054±0.059	1.022±0.021	1.021±0.021	1.054±0.060	1.073±0.014	1.059±0.058	1.021±0.021	0.973±0.011	0.984±0.042
Monocotyledons	11	XY2 separability	1.264±0.330	1.111±0.277	0.794±0.076	1.073±0.047	0.938±0.031	0.773±0.114	0.879±0.026	1.079±0.139	0.938±0.031	0.911±0.039	1.078±0.140	1.073±0.049	0.941±0.149	0.911±0.040	0.879±0.026	0.795±0.076
		XY0 conservatism	1.039±0.051	0.949±0.025	1.078±0.047	0.952±0.031	0.937±0.027	1.085±0.087	0.962±0.039	0.937±0.018	0.937±0.028	0.965±0.029	0.937±0.018	0.951±0.031	1.029±0.046	0.965±0.029	0.962±0.039	1.078±0.047
		XY1 conservatism	1.675±0.536	1.211±0.183	1.071±0.054	1.145±0.072	1.160±0.084	0.999±0.029	1.108±0.078	1.249±0.164	1.160±0.084	1.101±0.064	1.250±0.163	1.146±0.073	1.014±0.052	1.101±0.064	1.109±0.078	1.070±0.055
		XY2 conservatism	1.253±0.725	1.186±0.415	0.812±0.076	1.223±0.187	1.077±0.144	0.870±0.103	1.111±0.204	1.258±0.267	1.076±0.146	0.975±0.108	1.258±0.267	1.224±0.188	0.900±0.169	0.975±0.108	1.112±0.205	0.812±0.076
		XY0 separability	0.871±0.058	0.935±0.059	1.065±0.040	0.965±0.023	1.000±0.022	1.066±0.080	1.038±0.007	0.957±0.036	1.001±0.022	0.998±0.032	0.957±0.036	0.966±0.023	0.988±0.098	0.998±0.031	1.038±0.006	1.066±0.040
		XY1 separability	1.289±0.204	1.112±0.124	0.945±0.054	1.064±0.043	1.010±0.033	0.944±0.053	0.959±0.015	1.073±0.097	1.009±0.032	1.021±0.047	1.074±0.097	1.063±0.043	1.057±0.118	1.020±0.046	0.959±0.015	0.945±0.054
Pteridophyta	3	XY2 separability	1.665±0.623	1.297±0.391	0.763±0.064	1.049±0.095	0.936±0.061	0.762±0.215	0.856±0.046	1.204±0.139	0.934±0.061	0.908±0.091	1.205±0.141	1.047±0.095	0.905±0.317	0.907±0.092	0.855±0.046	0.762±0.064
		XY0 conservatism	1.026±0.036	0.973±0.076	1.073±0.030	0.953±0.025	0.942±0.068	1.072±0.205	0.970±0.053	0.958±0.052	0.942±0.069	0.947±0.062	0.958±0.052	0.953±0.025	1.040±0.180	0.947±0.063	0.970±0.053	1.074±0.029
		XY1 conservatism	1.742±0.744	1.200±0.308	1.067±0.005	1.133±0.071	1.153±0.216	1.056±0.029	1.104±0.122	1.204±0.352	1.153±0.217	1.150±0.171	1.204±0.354	1.133±0.072	1.096±0.098	1.152±0.172	1.104±0.124	1.067±0.005
		XY2 conservatism	1.880±0.917	1.239±0.597	0.888±0.080	1.130±0.229	1.135±0.260	0.917±0.453	1.090±0.136	1.337±0.354	1.135±0.263	1.076±0.204	1.335±0.347	1.129±0.224	0.866±0.441	1.077±0.207	1.089±0.130	0.887±0.079
		XY0 separability	1.072±0.323	1.163±0.263	0.949±0.111	0.967±0.037	0.984±0.074	0.924±0.150	1.058±0.141	1.041±0.137	0.984±0.074	0.988±0.084	1.041±0.137	0.966±0.037	0.842±0.117	0.988±0.083	1.057±0.141	0.949±0.111
		XY1 separability	1.027±0.419	0.898±0.176	1.168±0.277	1.065±0.065	1.044±0.122	1.181±0.356	0.957±0.153	0.971±0.145	1.044±0.123	1.040±0.109	0.971±0.145	1.065±0.065	1.466±0.545	1.040±0.108	0.957±0.152	1.168±0.276
Green algae	21	XY2 separability	0.929±1.162	0.650±0.465	1.171±0.564	1.034±0.161	0.967±0.203	1.423±0.980	0.825±0.361	0.905±0.443	0.967±0.205	0.963±0.298	0.905±0.442	1.035±0.163	2.018±1.540	0.963±0.296	0.827±0.361	1.173±0.562
		XY0 conservatism	1.223±0.626	1.362±0.469	0.940±0.083	0.934±0.050	0.986±0.083	0.926±0.088	1.005±0.207	1.034±0.135	0.987±0.083	0.940±0.103	1.033±0.135	0.934±0.050	0.959±0.122	0.940±0.103	1.005±0.207	0.941±0.083
		XY1 conservatism	1.298±0.879	1.043±0.185	1.374±0.522	1.180±0.175	1.081±0.159	1.438±0.656	1.156±0.248	1.051±0.155	1.081±0.158	1.204±0.264	1.051±0.152	1.180±0.176	2.225±1.613	1.202±0.262	1.156±0.249	1.374±0.519
		XY2 conservatism	1.283±2.326	0.667±0.309	1.664±1.120	1.198±0.455	0.972±0.371	2.012±1.962	1.130±0.773	1.012±0.477	0.970±0.373	1.277±0.700	1.013±0.473	1.201±0.462	3.848±5.114	1.271±0.692	1.129±0.772	1.665±1.131
		XY0 separability	0.976±0.123	0.997±0.100	0.996±0.062	0.979±0.016	0.998±0.016	1.007±0.075	1.035±0.029	0.990±0.036	0.998±0.016	1.032±0.026	0.990±0.036	0.979±0.016	0.920±0.060	1.032±0.026	1.035±0.028	0.995±0.061
		XY1 separability	1.063±0.211	1.016±0.128	1.024±0.092	1.036±0.025	1.015±0.021	1.000±0.099	0.958±0.031	1.015±0.060	1.015±0.021	0.975±0.026	1.016±0.060	1.036±0.024	1.160±0.135	0.975±0.026	0.959±0.030	1.025±0.091
		XY2 separability	1.078±0.513	1.026±0.422	0.998±0.267	1.025±0.065	0.929±0.073	0.958±0.233	0.884±0.078	1.045±0.161	0.930±0.074	0.832±0.081	1.045±0.161	1.027±0.065	1.250±0.314	0.833±0.082	0.885±0.077	1.000±0.266
Agaricomycotina	73	XY0 conservatism	1.029±0.158	1.004±0.111	1.033±0.043	0.954±0.025	1.012±0.051	0.982±0.064	0.962±0.068	0.990±0.028	1.011±0.051	0.997±0.036	0.990±0.028	0.954±0.025	1.086±0.195	0.996±0.036	0.962±0.067	1.032±0.042
		XY1 conservatism	1.239±0.539	1.115±0.152	0.996±0.099	1.102±0.071	1.015±0.076	1.086±0.106	1.148±0.092	1.061±0.066	1.016±0.076	1.113±0.076	1.061±0.067	1.103±0.072	1.332±0.318	1.114±0.077	1.148±0.092	0.997±0.099
		XY2 conservatism	1.281±0.863	1.168±0.358	1.019±0.262	1.213±0.153	0.904±0.165	1.175±0.270	1.257±0.310	1.042±0.155	0.907±0.164	0.971±0.142	1.042±0.156	1.218±0.153	1.401±0.486	0.972±0.141	1.257±0.308	1.022±0.257
		XY0 separability	0.968±0.084	1.007±0.078	1.002±0.048	0.963±0.015	1.005±0.022	1.007±0.070	1.016±0.040	0.996±0.043	1.005±0.022	1.019±0.023	0.996±0.043	0.963±0.015	0.929±0.076	1.019±0.023	1.016±0.040	1.002±0.048
		XY1 separability	1.067±0.168	1.002±0.104	1.018±0.069	1.063±0.026	1.007±0.028	1.006±0.085	0.987±0.067	1.005±0.107	1.007±0.028	0.993±0.033	1.005±0.107	1.063±0.026	1.174±0.155	0.993±0.033	0.987±0.068	1.018±0.069
		XY2 separability	1.067±0.325	0.957±0.239	0.952±0.184	1.086±0.072	0.908±0.074	0.925±0.254	0.914±0.083	1.025±0.158	0.908±0.074	0.849±0.056	1.025±0.158	1.086±0.072	1.059±0.408	0.849±0.056	0.914±0.083	0.952±0.184
Pezizomycotina	118	XY0 conservatism	0.969±0.086	0.970±0.126	1.044±0.086	0.952±0.039	0.999±0.063	1.017±0.184	0.943±0.069	0.966±0.061	0.999±0.063	0.967±0.060	0.966±0.061	0.952±0.039	1.155±0.358	0.967±0.060	0.943±0.069	1.043±0.086
		XY1 conservatism	1.306±0.920	1.163±0.337	1.001±0.120	1.172±0.155	1.050±0.112	1.098±0.131	1.205±0.416	1.156±0.528	1.051±0.112	1.166±0.158	1.156±0.530	1.172±0.155	1.356±0.519	1.167±0.158	1.205±0.416	1.002±0.119
		XY2 conservatism	1.312±1.113	1.134±0.567	0.902±0.256	1.238±0.230	0.899±0.156	0.951±0.477	1.145±0.479	1.173±0.628	0.900±0.153	0.998±0.256	1.172±0.628	1.237±0.226	0.972±0.897	0.999±0.254	1.144±0.477	0.903±0.257
		XY0 separability	0.866±0.123	0.903±0.114	1.108±0.118	0.968±0.025	0.986±0.030	1.110±0.163	1.032±0.027	0.936±0.059	0.986±0.030	1.006±0.030	0.936±0.059	0.968±0.025	1.016±0.136	1.006±0.030	1.032±0.028	1.108±0.118
		XY1 separability	1.346±0.561	1.204±0.292	0.910±0.100	1.054±0.043	1.032±0.050	0.905±0.129	0.963±0.027	1.119±0.159	1.032±0.050	1.004±0.041	1.119±0.158	1.055±0.043	1.010±0.176	1.004±0.041	0.963±0.028	0.910±0.100
Saccharomycetales	54	XY2 separability	2.202±2.649	1.645±1.090	0.700±0.208	1.072±0.118	0.971±0.093	0.736±0.289	0.889±0.101	1.384±0.416	0.970±0.094	0.914±0.090	1.386±0.413	1.073±0.117	0.916±0.386	0.914±0.092	0.890±0.102	0.700±0.209
		XY0 conservatism	0.998±0.087	0.968±0.069	1.124±0.106	0.932±0.037	0.951±0.073	1.070±0.201	0.970±0.036	0.963±0.046	0.951±0.072	0.979±0.041	0.963±0.046	0.932±0.036	0.987±0.106	0.979±0.041	0.969±0.036	1.124±0.107
		XY1 conservatism	1.760±1.004	1.347±0.406	1.094±0.121	1.162±0.104	1.118±0.149	1.061±0.092	1.076±0.049	1.221±0.250	1.118±0.148	1.058±0.066	1.221±0.251	1.163±0.103	1.149±0.231	1.058±0.066	1.076±0.049	1.094±0.119
		XY2 conservatism	2.768±2.830	1.661±0.933	0.882±0.245	1.310±0.400	1.139±0.397	1.083±0.411	1.128±0.301	1.535±0.610	1.139±0.395	0.999±0.263	1.537±0.611	1.310±0.398	1.153±0.558	1.001±0.262	1.130±0.302	0.883±0.248
		XY1 separability	1.250±1.321	1.109±0.527	1.033±0.504	1.063±0.162	1.029±0.141	1.040±0.496	1.040±0.121	1.011±0.389	1.029±0.141	0.946±0.153	1.009±0.383	1.062±0.162	1.218±0.730	0.947±0.154	1.039±0.121	1.032±0.503
		XY0 separability	1.029±0.353	0.987±0.159	1.017±0.169	0.979±0.056	0.991±0.055	1.020±0.219	0.986±0.045	1.010±0.108	0.991±0.055	1.027±0.071	1.010±0.108	0.979±0.056	0.975±0.222	1.027±0.072	0.986±0.045	1.017±0.169
Archaeo	200	XY1 conservatism	1.686±2.372	1.173±0.553	1.147±0.457	1.188±0.269	1.097±0.290	1.221±0.489	1.312±0.280	1.129±0.446	1.100±0.286	1.007±0.175	1.125±0.437	1.186±0.269	1.427±0.909	1.009±0.177	1.309±0.281	1.149±0.454
		XY0 conservatism	1.225±0.527	1.021±0.105	1.035±0.150	0.961±0.051	0.989±0.108	1.030±0.211	0.933±0.042	1.006±0.082	0.988±0.105	1.020±0.084	1.007±0.082	0.962±0.051	1.052±0.164	1.019±0.083	0.933±0.042	1.034±0.150
		XY1 separability	1.092±0.910	0.973±0.440	1.056±0.691	1.086±0.112	1.064±0.104	1.030±0.536	0.983±0.083	1.018±0.409	1.064±0.106	0.991±0.123	1.018±0.409	1.086±0.114	1.357±1.152	0.991±0.125	0.983±0.084	1.056±0.689
		XY0 separability	1.043±0.321	1.043±0.207	1.016±0.163	0.969±0.034	0.977±0.036	1.020±0.186	1.007±0.035	1.011±0.134	0.977±0.036	1.006±0.054	1.011±0.134	0.970±0.035	0.954±0.210	1.005±0.055	1.008±0.035	1.016±0.163
Eubacteria	300	XY1 conservatism	1.409±1.562	1.077±0.484	1.188±0.569	1.218±0.206	1.094±0.258	1.154±0.356	1.163±0.195	1.144±0.510	1.094±0.261	1.099±0.166	1.144±0.509	1.218±0.208	1.451±1.232	1.100±0.171	1.162±0.197	1.187±0.569
		XY0 conservatism	1.104±0.333	1.089±0.257	1.030±0.154	0.954±0.034	0.989±0.095	1.024±0.187	0.959±0.053	1.009±0.094	0.989±0.096	0.974±0.050	1.009±0.095	0.954±0.034	1.060±0.151	0.974±0.051	0.959±0.055	1.030±0.154
note: The point estimation are obtained under P<0.05. t test is used for the genome number lower than 30 and u test is used for the genome number larger than 30.
